# Supplementary material
Source: publisher figshare collection journal article supplement (https://geolsoc.figshare.com/ndownloader/files/5424443)
Supplement: Supplementary file 1 [file 5424443]

Table B7. Time series morphological data of Lake Biwa Stephanodiscus for paleo-TS 4.0-4.
slide_no.	depth_m	age_years	FD_mean	FD_variance	dia_mean	dia_variance	N
393-b	157.12	238366.07	3.46	0.21	8.43	3.33	23
391-a	156.28	237039.98	3.40	0.35	8.24	4.37	49
389-c	156.03	236653.21	3.30	0.33	8.73	4.56	22
389-a	155.54	235879.66	3.16	0.18	8.87	3.53	50
387-a	154.77	234664.08	3.29	0.17	8.32	3.62	50
385-c	154.32	233945.78	3.24	0.11	7.50	1.67	50
385-a	153.90	233282.74	3.01	0.25	8.29	3.24	24
381-a	152.27	230708.72	2.97	0.26	8.45	7.97	11
367-b	147.50	223171.33	2.67	0.07	9.96	1.38	12
353-b	142.50	215270.06	3.06	0.43	9.58	5.37	19
353-a	142.25	214874.99	3.00	0.29	9.07	4.99	34
351-d	142.00	214479.93	3.23	0.31	8.00	3.79	18
351-c	141.75	214084.87	3.01	0.38	9.08	4.48	18
347-c	140.11	211488.74	2.85	0.15	10.30	4.64	15
347-a	139.61	210698.61	3.10	0.30	9.01	4.06	37
345-a	139.11	209908.48	3.07	0.23	9.24	5.60	17
343-b	138.29	208610.42	3.02	0.12	8.81	3.83	16
341-b	137.71	207707.42	3.45	0.18	8.92	7.04	13
337-a	136.06	205096.53	3.17	0.16	9.10	5.61	35
335-c	135.57	204321.90	3.49	0.41	8.01	3.98	48
335-a	135.11	203598.90	3.33	0.25	8.83	5.65	49
331-c	134.10	201997.99	3.24	0.35	8.51	9.48	48
331-a	133.68	201326.64	3.15	0.24	8.87	5.85	50
329-a	133.15	200500.37	3.23	0.27	8.39	8.91	48
327-c	132.70	199777.38	3.01	0.23	8.76	7.28	47
327-a	132.26	199083.43	3.07	0.35	8.41	5.68	50
325-a	131.63	198095.77	2.54	0.15	9.49	5.18	50
323-c	131.18	197382.47	2.65	0.18	9.59	7.08	50
323-a	130.73	196669.16	2.51	0.12	9.77	3.37	50
321-c	130.17	195791.24	2.42	0.07	9.73	3.69	49
319-c	129.20	194254.88	2.30	0.08	8.25	3.09	50
319-a	128.68	193431.83	2.22	0.07	9.70	5.04	50
315-b	127.74	191950.34	2.20	0.05	11.21	7.12	50
313-c	127.13	190986.83	2.16	0.11	10.50	9.10	49
313-a	126.70	190302.05	2.18	0.12	10.21	8.67	50
311-b	126.30	189669.95	2.23	0.06	9.39	7.79	50
309-d	125.90	189037.85	2.22	0.10	10.21	5.23	19
309-b	125.40	188247.72	2.21	0.13	10.37	8.80	50
307-c	124.93	187510.27	2.31	0.16	9.35	7.65	50
307-a	124.63	187036.19	2.60	0.41	8.30	6.78	22
305-c	124.27	186456.77	2.32	0.17	9.09	6.13	49
305-a	123.77	185666.64	2.45	0.24	8.47	5.52	16
301-c	122.73	184033.71	2.41	0.40	9.65	5.85	50
301-a	122.23	183240.76	2.29	0.18	10.56	6.11	50
299-b	121.53	182127.16	2.44	0.25	9.60	6.30	50
295-d	120.49	180483.27	2.32	0.24	10.44	5.96	50
295-b	120.08	179846.92	2.43	0.22	10.38	6.58	49
293-b	119.55	178998.47	2.46	0.18	10.22	4.93	50
291-b	118.84	177884.86	2.60	0.42	9.66	5.98	50
289-b	118.00	176559.15	2.49	0.43	9.63	6.00	50
287-d	117.50	175763.72	2.71	0.44	9.25	7.96	50
287-b	117.12	175164.31	2.52	0.26	9.61	7.26	50
285-c	116.71	174510.41	2.50	0.21	9.79	7.22	50
285-a	116.22	173747.53	2.55	0.32	9.80	6.31	48
279-a	113.67	169715.16	2.65	0.15	9.00	5.78	19
277-a	113.16	168897.79	2.62	0.48	9.61	11.85	48
275-b	112.50	167862.45	2.85	0.24	8.28	7.43	16
273-a	111.74	166654.61	2.89	0.38	8.13	5.34	15
269-a	110.68	164993.84	2.80	0.48	8.23	11.54	49
263-d	109.47	163081.43	2.32	0.46	8.62	9.95	50
261-b	108.61	161722.61	2.04	0.55	9.67	9.26	50
259-c	107.50	159961.18	1.72	0.20	9.64	8.45	50
259-a	106.94	159076.71	1.99	0.54	8.15	9.59	50
251-c	105.22	156364.34	1.27	0.19	9.63	8.28	50
251-a	104.70	155538.83	1.22	0.23	9.51	10.57	50
249-b	103.84	154182.64	1.00	0.15	10.62	8.85	50
245-c	103.10	153003.35	1.22	0.24	8.79	8.61	50
245-a	102.50	152059.92	1.26	0.23	8.58	12.06	50
243-b	101.83	151003.06	0.89	0.07	10.33	8.75	24
241-d	101.16	149946.20	0.85	0.07	11.19	10.87	50
241-b	100.78	149342.28	1.04	0.03	11.02	10.53	26
239-a	99.70	147631.18	1.25	0.17	7.78	8.21	50
235-c	99.06	146624.65	1.31	0.24	8.06	11.29	50
235-a	98.52	145769.10	1.31	0.16	8.30	14.24	50
231-c	97.12	143563.35	1.44	0.23	7.76	11.76	50
231-a	96.54	142643.34	1.27	0.19	9.74	22.60	50
229-b	95.48	140965.67	1.19	0.16	11.50	17.72	50
225-c	94.73	139775.07	1.29	0.31	9.73	18.10	50
223-c	93.63	138043.28	1.43	0.17	7.99	8.62	50
219-c	92.50	136257.38	1.47	0.18	6.99	5.88	50
219-a	91.96	135408.92	1.20	0.08	9.04	8.69	50
215-c	91.33	134401.38	1.38	0.17	8.09	8.57	50
215-a	90.82	133605.95	1.41	0.17	8.47	9.52	50
213-b	90.08	132439.32	1.39	0.14	6.95	4.36	50
211-c	89.48	131484.80	1.47	0.13	7.15	6.00	50
211-a	89.18	131007.54	1.40	0.14	8.95	11.60	50
207-c	88.71	130265.14	1.26	0.09	10.51	18.17	50
207-a	88.20	129023.66	1.51	0.25	9.74	23.94	50
205-a	87.84	128860.94	1.29	0.13	10.66	21.64	50
203-c	87.50	128318.53	1.39	0.12	8.93	17.86	50
203-a	87.11	127688.78	1.39	0.16	8.55	15.60	50
201-c	86.66	126954.06	1.33	0.22	8.87	23.41	49
201-b	86.40	126534.22	1.28	0.19	9.40	17.01	50
199-c	85.49	125064.79	1.07	0.16	9.80	20.43	50
199-a	84.84	124015.19	1.04	0.12	9.94	19.14	50
197-a	84.38	123280.47	1.05	0.17	10.32	32.14	50
195-c	83.18	121338.72	1.09	0.15	9.90	41.64	50
195-a	82.86	120813.92	0.99	0.09	10.42	33.73	50
193-a	82.22	119784.51	1.08	0.12	10.94	57.30	50
191-c	81.03	117862.94	0.94	0.09	13.36	71.42	50
191-a	80.51	117015.19	1.08	0.14	10.61	57.49	50
189-b	79.77	115828.34	0.97	0.10	11.56	64.56	50
187-c	79.04	114641.49	1.06	0.10	10.45	42.20	50
187-a	78.55	113850.26	1.13	0.14	9.51	38.24	50
185-c	78.06	113059.03	1.09	0.10	13.64	86.02	50
185-a	77.50	112154.76	1.08	0.08	12.26	62.00	50
183-b	76.39	110364.47	1.00	0.09	13.98	80.21	50
181-c	75.51	108932.23	0.99	0.05	14.99	75.90	50
177-d	73.64	104168.24	0.99	0.12	14.35	90.72	50
177-b	73.16	102556.10	0.87	0.03	15.33	73.43	50
175-c	72.25	99456.06	0.82	0.03	17.99	65.89	50
175-a	71.68	97529.12	0.92	0.07	14.86	65.11	50
173-c	70.80	94738.56	1.00	0.14	14.60	87.80	50
173-b	70.16	93562.07	0.91	0.05	13.95	48.17	50
171-d	69.88	93039.19	1.03	0.14	10.99	40.64	50
171-b	69.63	92581.66	0.98	0.17	11.83	19.83	50
169-d	68.95	91339.81	0.95	0.13	15.53	79.70	50
169-b	68.42	90359.41	1.00	0.11	14.51	89.91	50
167-a	67.85	89313.64	0.90	0.09	16.43	79.65	50
165-c	67.50	88660.03	1.01	0.10	10.89	43.11	50
165-a	67.15	88015.57	0.82	0.03	14.26	26.47	50
163-b	66.31	86791.42	0.91	0.06	12.82	37.55	50
159-d	65.65	85949.98	0.94	0.07	13.61	77.09	50
159-b	65.09	85241.40	0.86	0.05	16.29	72.46	50
155-d	64.46	84444.25	1.00	0.11	14.44	107.28	50
155-b	63.93	83779.95	0.88	0.08	16.39	106.54	49
153-d	63.27	82938.51	0.92	0.09	15.26	98.22	50
153-b	62.74	82274.22	0.95	0.10	15.08	99.03	50
151-a	62.12	81483.79	0.85	0.06	12.94	57.81	50
147-d	61.71	80959.68	0.98	0.10	12.75	73.86	50
147-b	61.22	80348.23	1.03	0.08	10.32	40.03	50
143-d	60.64	79605.74	1.01	0.09	10.67	32.48	50
143-b	60.16	78994.29	1.06	0.14	10.53	51.38	50
139-b	59.09	77640.35	1.04	0.10	10.88	56.70	50
135-d	58.53	76941.54	0.88	0.09	16.17	98.14	50
135-b	58.02	76286.41	0.96	0.06	11.24	37.14	50
131-d	57.50	75631.28	0.83	0.04	14.12	35.12	50
131-b	57.02	75028.14	0.95	0.09	13.24	39.83	50
129-d	56.45	74295.76	0.86	0.04	14.84	77.08	50
129-b	56.00	73735.71	0.96	0.12	13.96	56.38	50
127-d	55.77	73434.14	0.82	0.08	16.55	77.22	50
127-b	55.29	72831.00	0.79	0.04	14.45	29.69	50
123-d	54.27	71538.56	0.90	0.11	15.93	83.35	50
123-b	53.62	70720.02	0.98	0.15	14.48	80.93	50
121-d	53.25	70246.13	0.93	0.11	15.86	103.34	50
121-b	52.74	69599.91	0.87	0.09	15.98	77.85	50
119-c	50.61	66907.76	1.04	0.14	12.86	56.80	50
117-d	50.41	66656.12	0.87	0.07	13.98	42.55	50
117-b	49.95	66068.96	0.89	0.09	16.53	76.13	50
115-d	49.42	65397.92	1.02	0.10	12.18	42.01	50
115-b	48.96	64810.76	0.99	0.12	13.34	47.36	50
113-d	48.43	64139.72	0.83	0.06	16.47	70.15	50
113-b	48.03	63636.44	0.90	0.12	14.91	64.66	50
111-d	47.50	62965.40	0.83	0.06	16.36	87.09	49
111-b	47.13	62491.51	0.87	0.08	13.89	50.73	50
107-d	46.48	61672.97	0.90	0.07	16.17	131.50	50
107-b	45.97	61026.75	0.86	0.08	16.68	92.50	50
105-b	44.98	59777.40	0.89	0.12	15.48	84.38	50
103-d	44.44	59088.10	0.88	0.06	16.13	95.13	50
103-b	43.96	58484.96	0.85	0.12	16.31	72.55	50
97-d	42.50	56632.47	0.91	0.10	15.11	79.77	50
97-b	42.02	56021.01	0.90	0.10	16.06	102.03	50
95-d	41.47	55322.20	0.76	0.03	22.94	131.99	50
95-b	40.95	54667.07	0.85	0.04	14.98	58.93	50
93-d	40.43	54011.94	0.84	0.07	18.31	110.88	50
93-b	39.93	53378.65	0.74	0.06	20.23	90.90	50
85-c	37.74	50605.26	0.93	0.06	12.92	52.44	50
85-a	37.23	49939.00	1.00	0.12	11.91	77.72	50
83-c	36.76	49085.05	0.88	0.07	13.01	44.22	50
83-a	36.25	48170.10	0.94	0.08	12.78	33.07	50
81-c	35.79	47346.65	0.85	0.06	13.29	43.88	50
81-a	35.30	46462.20	0.96	0.09	12.78	36.74	50
75-d	34.80	45547.25	0.76	0.04	17.78	84.08	50
75-b	34.36	44754.29	0.76	0.06	16.92	79.60	50
73-d	33.89	43900.34	0.92	0.07	12.50	34.32	50
73-b	33.51	43229.38	0.86	0.19	16.44	55.68	50
71-d	33.04	42375.43	0.94	0.08	11.06	34.05	50
71-b	32.70	41765.46	0.84	0.06	13.15	48.94	50
69-d	32.28	41010.88	0.88	0.06	13.39	52.57	50
69-b	31.87	40263.57	0.86	0.07	14.63	76.05	50
67-a	30.91	38529.81	1.04	0.12	10.85	39.54	50
63-c	29.95	36796.06	0.85	0.08	14.69	77.94	50
63-a	29.49	35959.07	0.97	0.13	15.95	96.34	50
61-c	29.01	35092.19	0.86	0.05	11.80	15.52	50
61-a	28.53	34225.31	0.91	0.13	12.19	35.16	50
59-c	28.00	33268.76	0.75	0.04	15.69	68.62	50
59-a	27.50	32371.99	1.02	0.07	9.69	21.12	50
57-c	26.99	31450.81	0.93	0.09	10.94	31.98	50
57-a	26.48	30529.64	1.07	0.10	10.84	34.44	50
55-b	26.00	29669.88	0.86	0.06	13.73	61.60	50
51-d	25.43	28759.12	0.84	0.05	12.21	30.78	50
51-b	25.05	28230.15	0.81	0.05	13.08	34.08	50
49-d	24.54	27508.83	0.82	0.10	14.77	67.02	50
49-b	24.03	26787.51	0.78	0.04	13.82	56.89	50
47-d	23.52	26066.19	1.04	0.10	10.58	42.68	50
47-b	23.01	25344.87	0.79	0.06	14.14	44.39	50
45-d	22.50	24623.55	0.90	0.05	16.45	75.96	50
45-b	22.08	24034.47	0.89	0.03	17.38	62.15	50
41-a	21.49	23199.94	0.83	0.03	12.63	30.44	50
39-c	21.11	22659.95	0.88	0.03	15.06	25.28	50
39-a	20.59	21923.61	0.93	0.05	12.26	40.89	50
37-c	20.10	21236.35	0.83	0.02	16.40	36.76	50
37-a	19.58	20500.00	0.99	0.08	12.36	61.66	50
35-c	19.06	19585.41	0.83	0.04	15.22	23.06	50
33-c	18.02	17756.23	0.88	0.04	15.42	49.23	50
33-a	17.50	16841.64	0.89	0.04	14.26	51.40	50
27-d	16.61	15275.77	0.88	0.03	15.20	55.21	50
27-b	16.16	14492.83	0.87	0.02	16.45	75.35	50
25-d	15.68	13653.97	0.94	0.05	14.80	89.86	50
25-b	15.24	12871.04	0.95	0.03	15.87	81.04	50
23-d	14.73	11976.25	0.94	0.04	14.63	54.95	50
23-b	14.22	11081.47	0.93	0.03	12.04	37.92	50
21-c	13.55	10295.71	0.91	0.02	14.18	55.04	50
21-a	13.07	9798.26	0.88	0.03	13.76	47.19	50
17-d	12.22	8914.05	0.85	0.04	15.80	65.74	50
17-b	11.84	8519.06	0.86	0.02	14.55	44.60	50
15-b	10.81	7441.82	0.85	0.02	15.97	55.85	50
13-d	10.33	6908.55	0.90	0.02	14.70	70.61	50
13-b	9.78	6386.62	0.93	0.03	13.56	79.49	50
11-d	9.29	5929.93	0.93	0.04	13.70	84.58	50
11-b	8.74	5408.01	0.92	0.05	14.91	100.65	50
9-d	8.22	4918.70	0.95	0.05	12.49	54.33	50
9-b	7.74	4462.01	0.89	0.04	13.29	62.13	50
7-a	6.33	3130.00	0.94	0.04	10.59	40.82	50
5-c	5.67	2499.34	0.92	0.04	10.82	46.39	50
5-a	4.92	1789.84	0.91	0.03	10.91	37.02	50
3-c	4.25	1159.17	0.84	0.03	15.90	82.46	50
3-a	3.58	528.51	0.88	0.05	12.62	58.43	50
1-a	2.50	-496.32	0.90	0.02	10.34	14.27	50
